# Supplementary material for: Origanum dubium (Cypriot Oregano) as a Promising Sanitizing Agent against Salmonella enterica and Listeria monocytogenes on Tomato and Cucumber Fruits
Source: MDPI journal article supplement (doi:10.3390/biology11121772), 2022-12-06
Supplement: s1 [file s1]

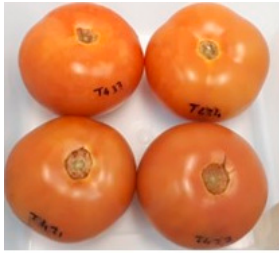

**0.5%-20 min**

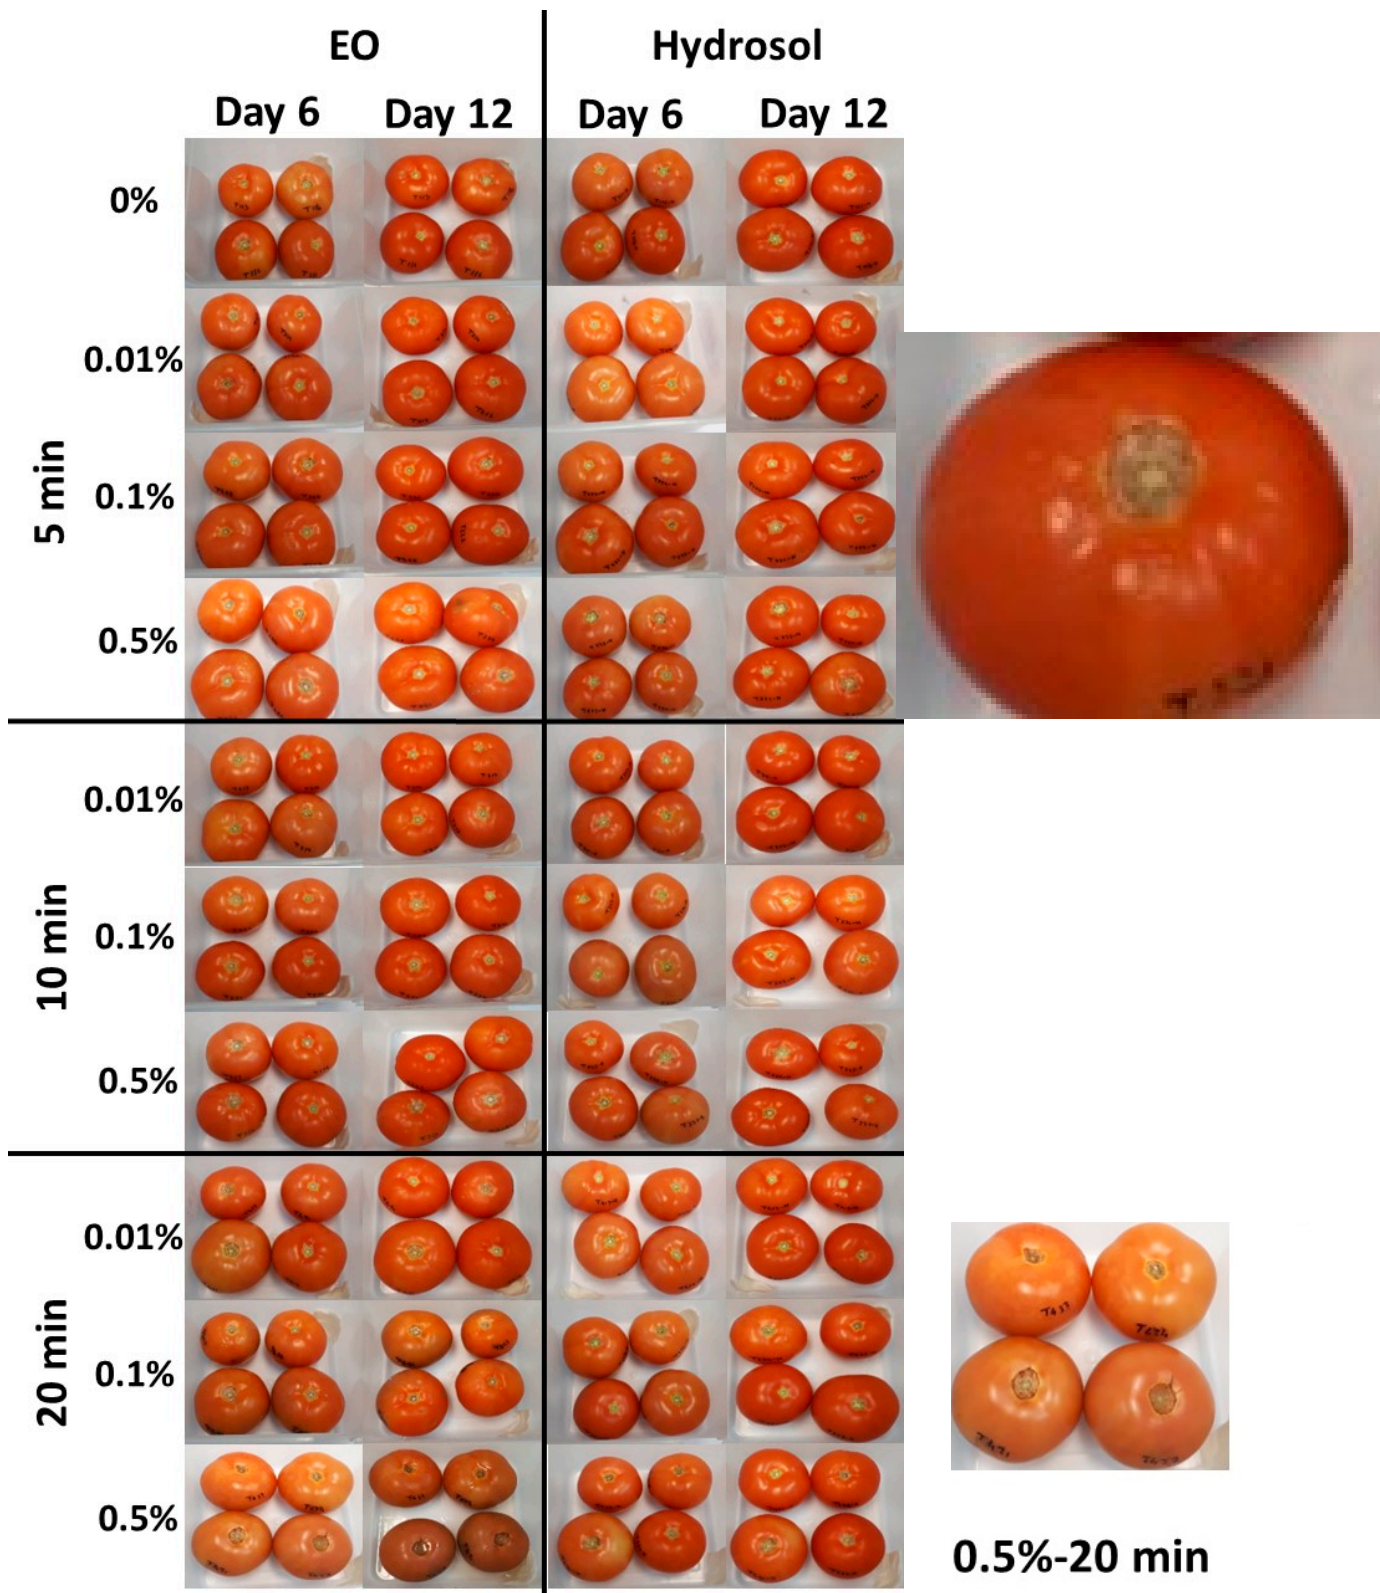

Figure S1. Screening of *O. dubium* EO and hydrosol application on tomatoes

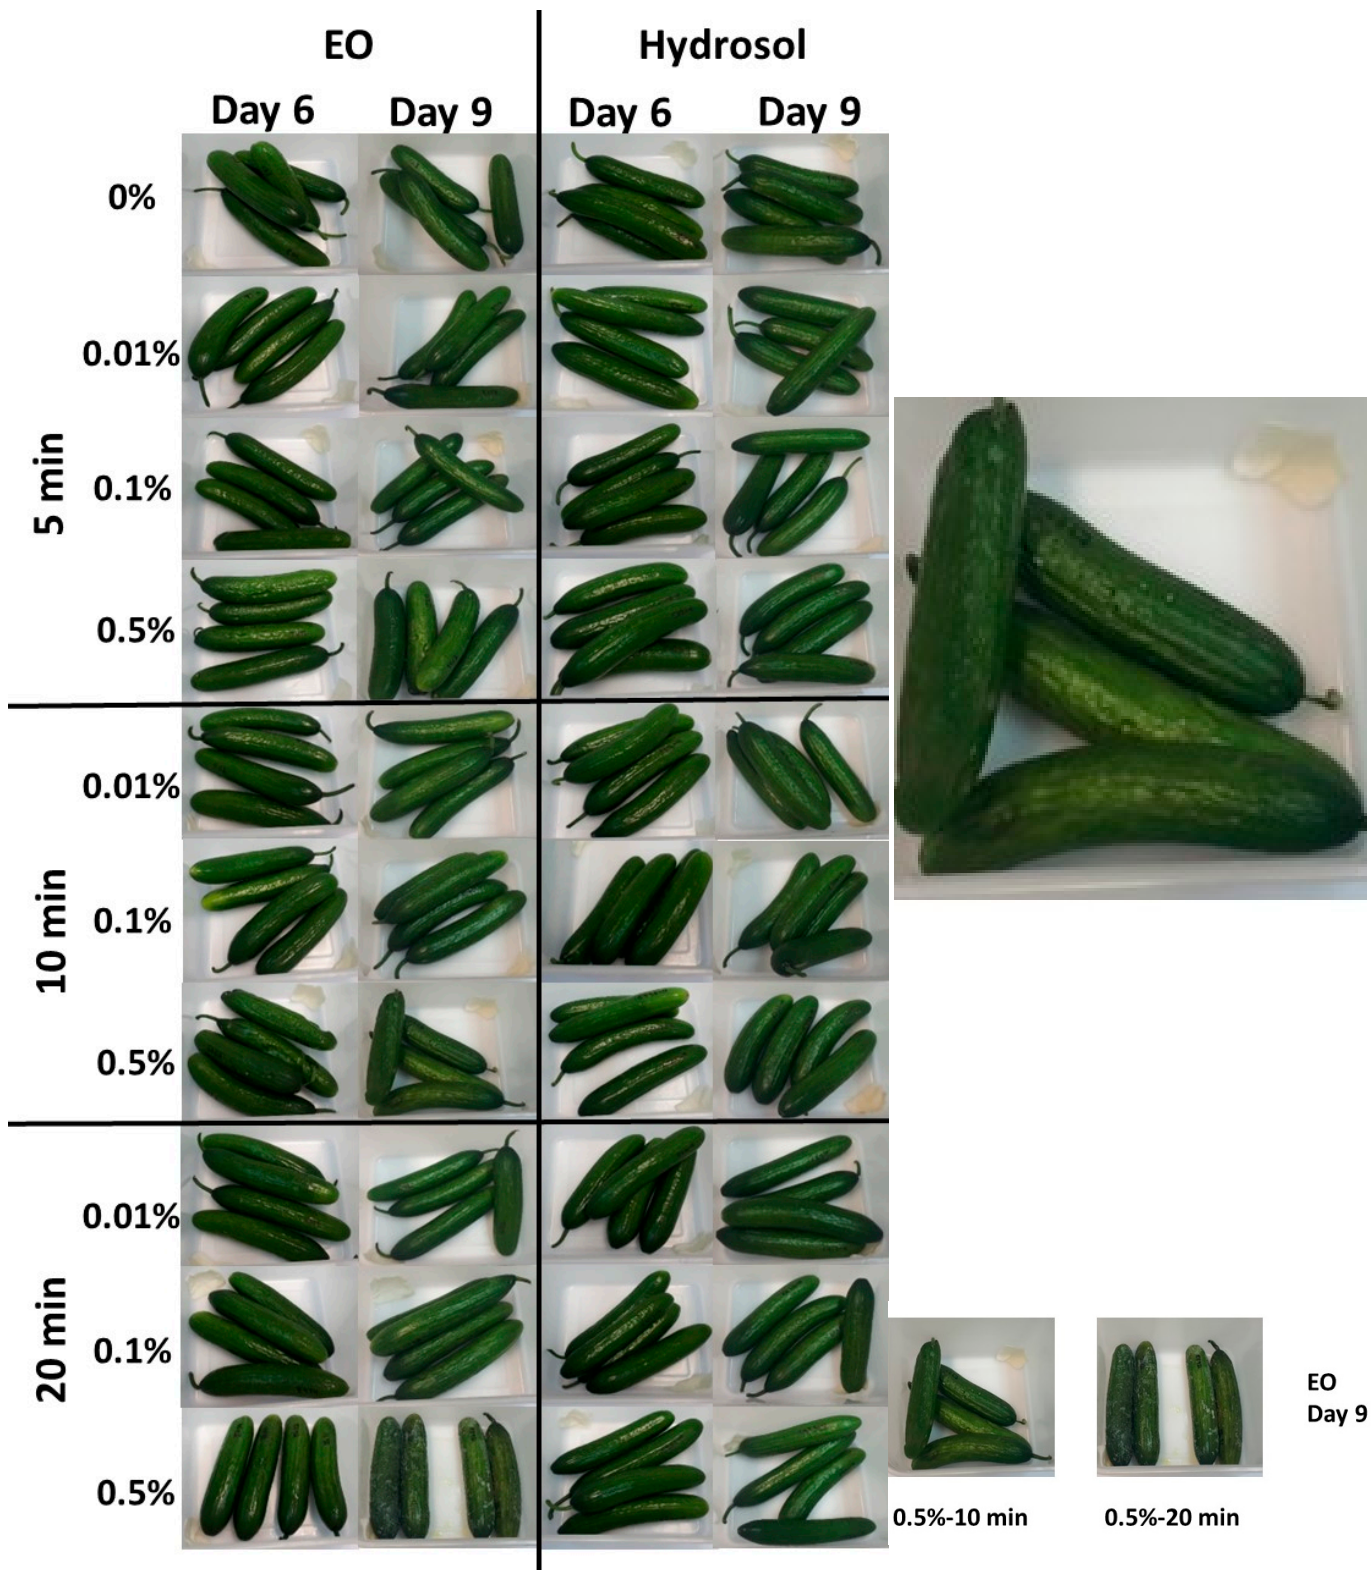

Figure S2. Screening of *O. dubium* EO and hydrosol application on cucumbers.
